# Supplementary material
Source: bioRxiv or medRxiv preprint supplement (https://www.biorxiv.org/highwire/filestream/122228/field_highwire_adjunct_files/0/404616-1.pdf)

Figure S1.

A

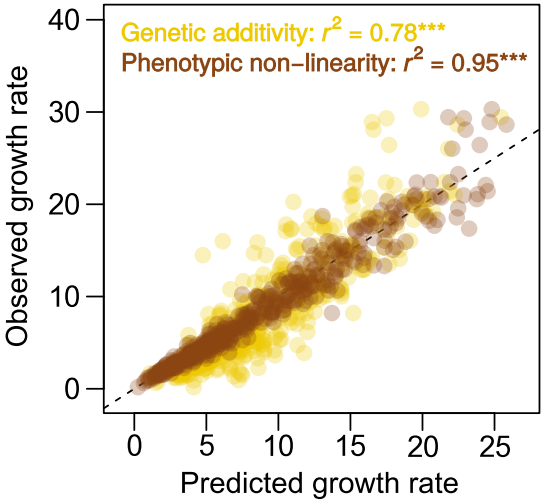

B

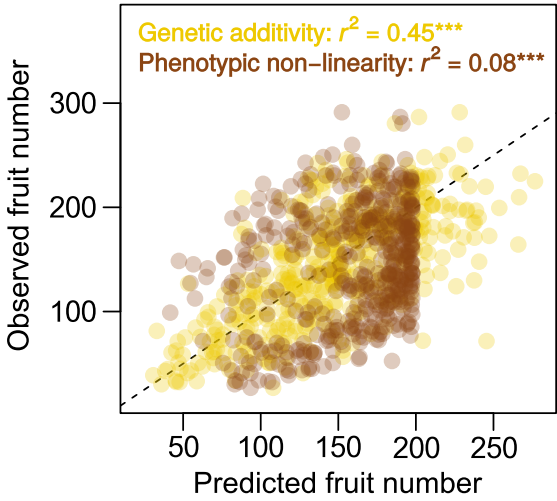

Supplement: Supplementary file [file 404616-1.pdf]
